# Supplementary material
Source: PubMed Central journal article supplement (PMC10038152)
Supplement: NIHMS1854107-supplement-Supplemental_Material.pdf [file NIHMS1854107-supplement-Supplemental_Material.pdf]

## **SUPPLEMENTAL MATERIALS**

### Heparin Does Not Regulate Circulating Human PCSK9 in a General Population

Vivian Q. Xia, BA<sup>1,2</sup>; Chui Mei Ong, BS<sup>3,4</sup>; Lucas S. Zier, MD, MS<sup>1,2</sup>; John S. MacGregor, MD, PhD<sup>1,2</sup>; Alan H. B. Wu, PhD<sup>3,4</sup>; John S. Chorba, MD<sup>\*,1,2</sup>

#### Affiliations:

<sup>1</sup>Division of Cardiology, Zuckerberg San Francisco General Hospital

<sup>2</sup>Department of Medicine, University of California San Francisco

<sup>3</sup>Clinical Chemistry Laboratory, Zuckerberg San Francisco General Hospital

<sup>4</sup>Department of Laboratory Medicine, University of California San Francisco

#### Contents

Figure S1: Flowchart of Subjects in Main Cohort

Figure S2: Baseline PCSK9 Concentrations of Subgroups of Main Cohort

Figure S3: Lipid Panels of Study Subjects

Figure S4: PCSK9 Concentrations in Patients Excluded Due to Prior Heparin Exposure

Figure S5: Effect of Heparin on Plasma ApoB

Table S1: Subgroup Analyses of Main Cohort

Major Resources Table

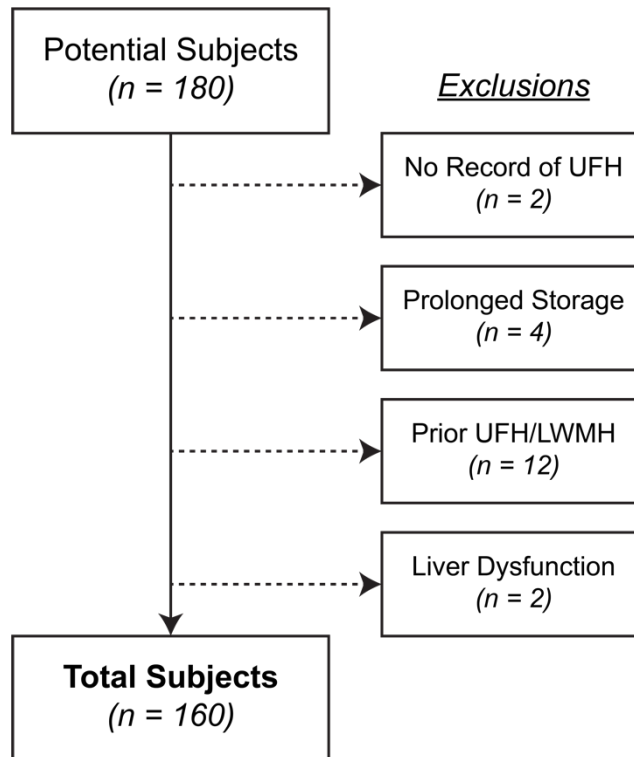

**Figure S1: Flowchart of Subjects in Main Cohort.** “Potential Subjects” indicates those in whom remnant blood samples were recovered and stored. “Total Subjects” indicates those remaining after exclusion criteria (right) were applied.

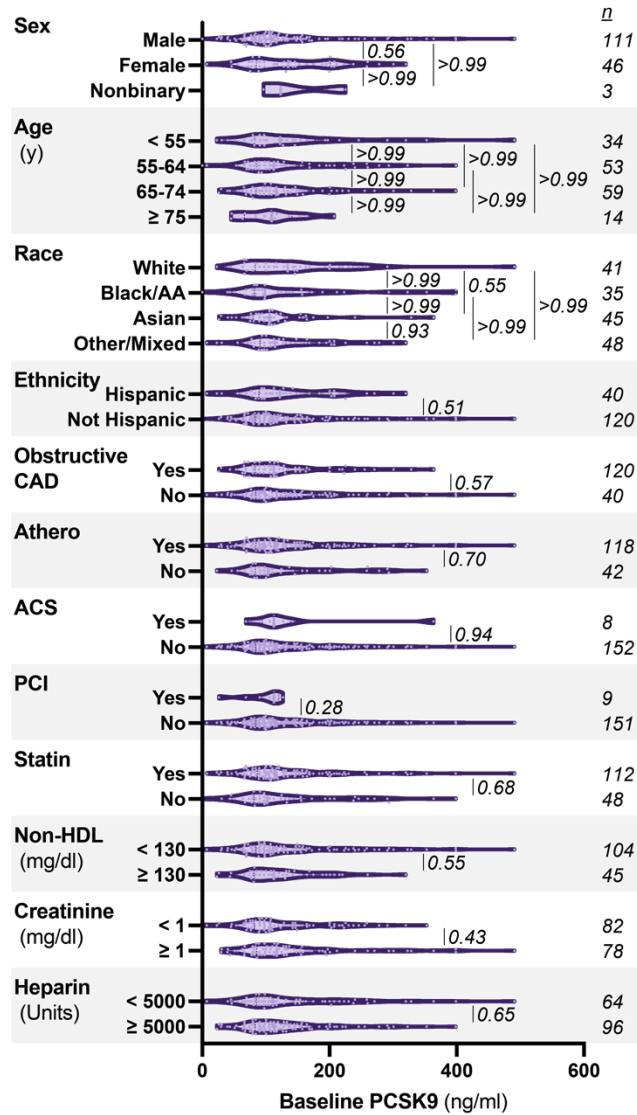

**Figure S2: Baseline PCSK9 Concentrations of Subgroups of Main Cohort.** Violin plots of the baseline (pre-UFH) plasma PCSK9 concentrations. *p* values represent Mann-Whitney tests for two groups, and Kruskal-Wallis test with Dunn's correction for three or more groups. *n* = number of subjects in the indicated stratum. AA = African American. CAD = coronary artery disease. Athero = atherosclerosis. ACS = acute coronary syndrome. PCI = percutaneous coronary intervention. HDL = high density lipoprotein.

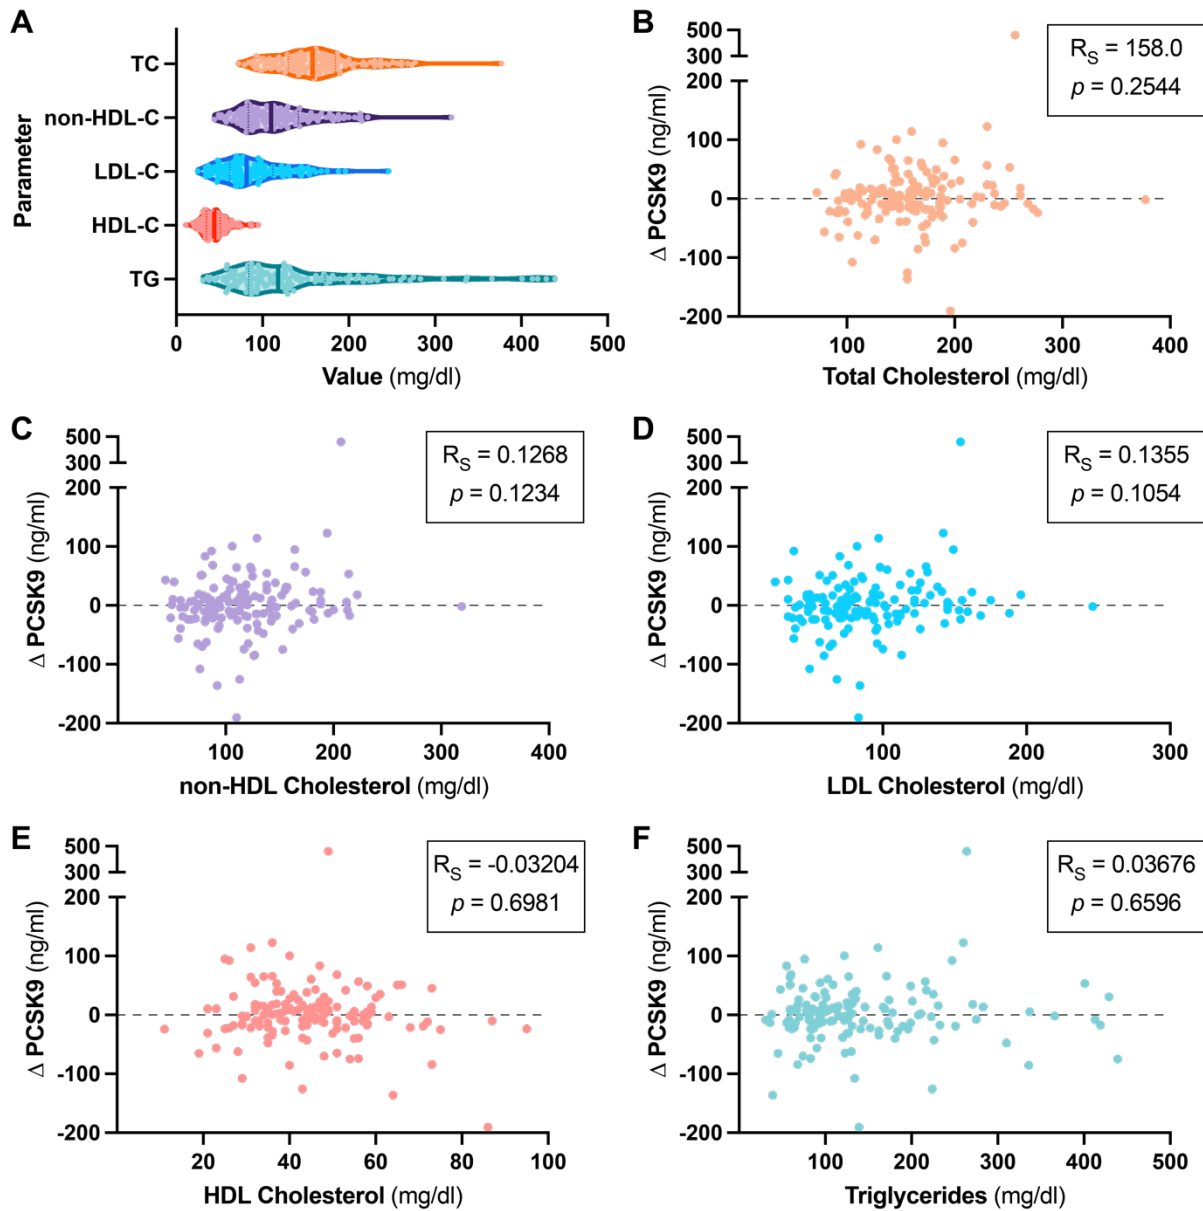

**Figure S3: Lipid Panels of Study Subjects.** A) Violin plots of the baseline lipid panels of the study subjects. Each dot represents a study subject. B-F) Plots of the change in PCSK9 due to UFH administration against pre-treatment plasma total cholesterol (B), non-HDL cholesterol (C), LDL cholesterol (D), HDL cholesterol (E), or triglycerides (F). Spearman's correlation coefficient ( $R_S$ ) and  $p$  value shown in box. Note the discontinuous Y axes in B-F. TC = total cholesterol. LDL = low density lipoprotein. HDL = high density lipoprotein. TG = triglycerides.

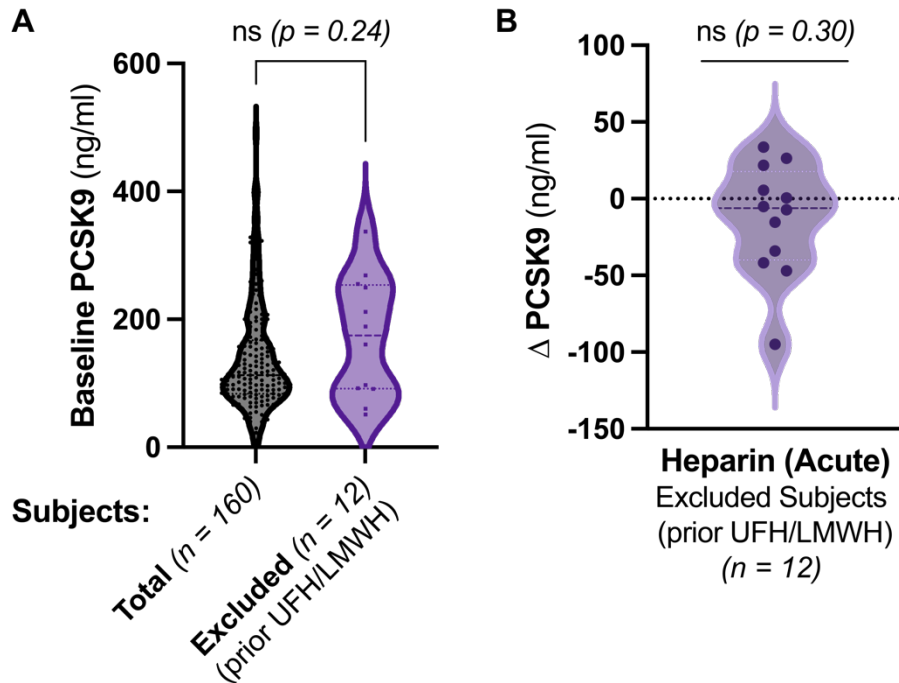

**Figure S4: PCSK9 Concentrations in Patients Excluded Due to Prior Heparin Exposure.**  
 A) Baseline (pre-UFH) plasma PCSK9 in study subjects (after exclusions, black) and subjects excluded due to prior UFH or low-molecular weight heparin (LMWH) administration (purple). Mann-Whitney test shown. B) Difference in plasma PCSK9 before and after IV UFH in these excluded subjects. Wilcoxon signed-rank test, compared to a hypothetical median of 0, shown.

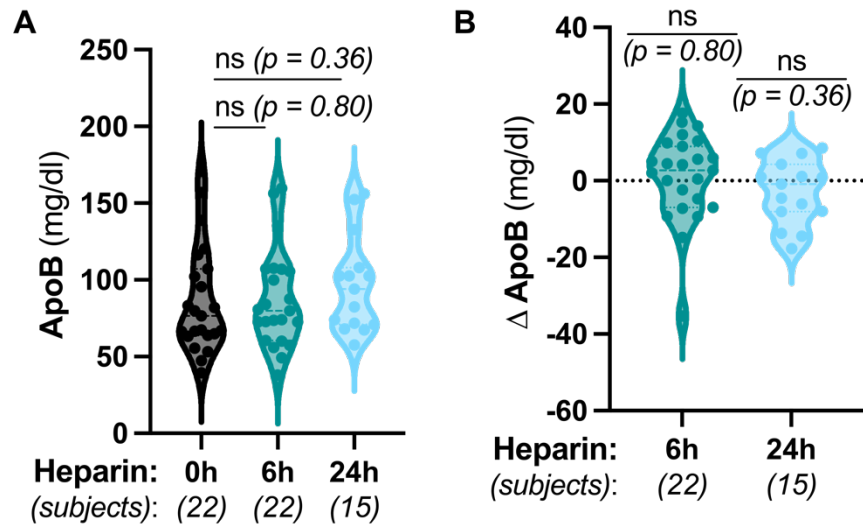

**Figure S5: Effect of Heparin on Plasma ApoB.** A) Violin plots of plasma apolipoprotein B (ApoB) concentrations before (black) or after 6 hr (teal) or 24 hr (light blue) infusions of IV UFH. Paired t test with Holm-Sidak correction shown. B) Violin plot of difference in plasma ApoB concentrations before and after IV UFH infusions. One sample t test (compared to hypothetical mean of 0) with Holm-Sidak correction shown. Source data is the same as from A.

| <b>Variable</b>                 | <b>n</b> | <b><math>\Delta</math>PCSK9<sub>median</sub><br/>[ng/ml, (%)]</b> | <b>Raw p</b> | <b>Adj. p<br/>(in variable)</b> | <b>Adj. p<br/>(all strata)</b> |
|---------------------------------|----------|-------------------------------------------------------------------|--------------|---------------------------------|--------------------------------|
| <b>Sex</b>                      |          |                                                                   |              |                                 |                                |
| Male                            | 111      | -1.72, (1.59)                                                     | 0.82         | 0.96                            | >0.99                          |
| Female                          | 46       | 3.72, (2.76)                                                      | 0.80         | 0.96                            | >0.99                          |
| Nonbinary                       | 3        | 40.5, (32.9)                                                      | 0.25         | 0.58                            | >0.99                          |
| <b>Age (y)</b>                  |          |                                                                   |              |                                 |                                |
| < 55                            | 34       | -5.43, (-4.43)                                                    | 0.57         | 0.83                            | >0.99                          |
| 55-64                           | 53       | 5.35, (4.75)                                                      | 0.54         | 0.83                            | >0.99                          |
| 65-74                           | 59       | -2.00, (-1.72)                                                    | 0.45         | 0.83                            | >0.99                          |
| ≥ 75                            | 14       | 15.5, (14.2)                                                      | 0.025        | 0.095                           | 0.54                           |
| <b>Race</b>                     |          |                                                                   |              |                                 |                                |
| White                           | 41       | -0.306, (-0.228)                                                  | 0.67         | 0.78                            | >0.99                          |
| Black/AA                        | 35       | -2.00, (-2.04)                                                    | 0.53         | 0.78                            | >0.99                          |
| Asian                           | 45       | 8.54, (8.08)                                                      | 0.31         | 0.68                            | >0.99                          |
| Other/Mixed                     | 48       | 3.42, (2.98)                                                      | 0.15         | 0.47                            | 0.99                           |
| <b>Ethnicity</b>                |          |                                                                   |              |                                 |                                |
| Hispanic                        | 40       | 3.42, (2.80)                                                      | 0.25         | 0.44                            | >0.99                          |
| Not Hispanic                    | 120      | -1.86, (-1.66)                                                    | 0.63         | 0.63                            | >0.99                          |
| <b>Obstructive CAD</b>          |          |                                                                   |              |                                 |                                |
| Yes                             | 64       | 3.06, (2.71)                                                      | 0.29         | 0.50                            | >0.99                          |
| No                              | 96       | -2.05, (-1.75)                                                    | 0.57         | 0.57                            | >0.99                          |
| <b>Atherosclerosis</b>          |          |                                                                   |              |                                 |                                |
| Yes                             | 118      | -2.00, (-1.72)                                                    | 0.77         | 0.77                            | >0.99                          |
| No                              | 42       | 5.11, (4.94)                                                      | 0.31         | 0.53                            | >0.99                          |
| <b>ACS</b>                      |          |                                                                   |              |                                 |                                |
| Yes                             | 8        | -8.00, (-7.09)                                                    | 0.64         | 0.87                            | >0.99                          |
| No                              | 152      | -0.171, (-0.151)                                                  | 0.77         | 0.87                            | >0.99                          |
| <b>PCI</b>                      |          |                                                                   |              |                                 |                                |
| Yes                             | 9        | 7.25, (6.44)                                                      | 0.36         | 0.59                            | >0.99                          |
| No                              | 151      | -0.377, (-0.331)                                                  | 0.99         | 0.99                            | >0.99                          |
| <b>Statin</b>                   |          |                                                                   |              |                                 |                                |
| Yes                             | 112      | 1.63, (1.42)                                                      | 0.70         | 0.91                            | >0.99                          |
| No                              | 48       | -3.12, (-3.05)                                                    | 0.90         | 0.91                            | >0.99                          |
| <b>Non-HDL Chol</b>             |          |                                                                   |              |                                 |                                |
| < 130 mg/dl                     | 104      | -1.01, (-0.908)                                                   | 0.61         | 0.61                            | >0.99                          |
| ≥ 130 mg/dl                     | 45       | 3.92, (3.48)                                                      | 0.22         | 0.39                            | >0.99                          |
| <b>Creatinine</b>               |          |                                                                   |              |                                 |                                |
| < 1 mg/dl                       | 82       | 1.26, (1.18)                                                      | 0.67         | 0.89                            | >0.99                          |
| ≥ 1 mg/dl                       | 78       | -2.05, (-1.75)                                                    | 0.97         | 0.97                            | >0.99                          |
| <b>Heparin Dose</b>             |          |                                                                   |              |                                 |                                |
| < 5000 U                        | 64       | -3.80, (-3.43)                                                    | 0.35         | 0.58                            | >0.99                          |
| ≥ 5000 U                        | 96       | -0.341, (-0.301)                                                  | 0.36         | 0.58                            | >0.99                          |
| <b>Baseline PCSK9</b>           |          |                                                                   |              |                                 |                                |
| 1 <sup>st</sup> Quartile (low)  | 40       | 5.86, (8.76)                                                      | 0.0014       | 0.0055                          | 0.044                          |
| 2 <sup>nd</sup> Quartile        | 40       | 7.03, (7.18)                                                      | 0.59         | 0.83                            | >0.99                          |
| 3 <sup>rd</sup> Quartile        | 40       | -1.87, (-1.38)                                                    | 0.63         | 0.83                            | >0.99                          |
| 4 <sup>th</sup> Quartile (high) | 40       | -31.6, (-13.9)                                                    | 0.020        | 0.059                           | 0.48                           |

**Table S1: Subgroup Analyses of Main Cohort.** n = number of subjects in each stratum.  $\Delta$ PCSK9<sub>median</sub> denotes the difference between the observed median of the change in plasma PCSK9 from 0 (the null hypothesis). %  $\Delta$ PCSK9<sub>median</sub> normalizes the  $\Delta$ PCSK9<sub>median</sub> value to baseline plasma PCSK9 for that stratum. p values determined by the Wilcoxon matched-pairs signed rank test and adjusted by Holm-Sidak correction for either the strata within a given variable (*in variable*), or all strata evaluated (*all strata*).

## Major Resources Table

| Description     | Source / Repository    | Persistent ID / URL                                                                                                                                       |
|-----------------|------------------------|-----------------------------------------------------------------------------------------------------------------------------------------------------------|
| PCSK9 ELISA kit | Abcam (ab209884)       | <a href="https://www.abcam.com/human-pcsk9-elisa-kit-ab209884.html">https://www.abcam.com/human-pcsk9-elisa-kit-ab209884.html</a>                         |
| PCSK9 ELISA kit | RayBiotech (ELH-PCSK9) | <a href="https://www.raybiotech.com/human-proprotein-convertase-9-pcsk9-elisa/">https://www.raybiotech.com/human-proprotein-convertase-9-pcsk9-elisa/</a> |
| ApoB ELISA kit  | MabTech (3715-1HP)     | <a href="https://www.mabtech.com/products/elisa-pro-human-apob-3715-1hp">https://www.mabtech.com/products/elisa-pro-human-apob-3715-1hp</a>               |
| Prism v9        | GraphPad               | <a href="https://www.graphpad.com">https://www.graphpad.com</a>                                                                                           |
| Illustrator v22 | Adobe                  | <a href="https://www.adobe.com/products/illustrator.html">https://www.adobe.com/products/illustrator.html</a>                                             |
